# Supplementary material for: Phase I trial of volasertib, a Polo-like kinase inhibitor, plus platinum agents in solid tumors: safety, pharmacokinetics and activity
Source: Springer Nature journal article supplement (doi:10.1007/s10637-015-0223-9), 2015-03-20

## **Online Resource**

### **Information for submission of supplementary material**

**Title:** Phase I trial of volasertib, a Polo-like kinase inhibitor, plus platinum agents in solid tumors

**Journal:** Investigational New Drugs

**Authors:** Ahmad Awada · Herlinde Dumez · Philippe G. Aftimos · Jo Costermans · Sylvie Bartholomeus · Kathleen Forceville · Thierry Berghmans · Marie-Anne Meeus · Jessica Cescutti · Gerd Munzert · Korinna Pilz · Dan Liu · Patrick Schöffski

**Corresponding author:** Dr A. Awada; Institut Jules Bordet, Université Libre de Bruxelles, Boulevard de Waterloo 121, B-1000 Brussels, Belgium; E-mail: [ahmad.awada@bordet.be](mailto:ahmad.awada@bordet.be); Phone: +32 2 541 31 89; Fax: +32 2 541 33 39

**a****Cisplatin arm**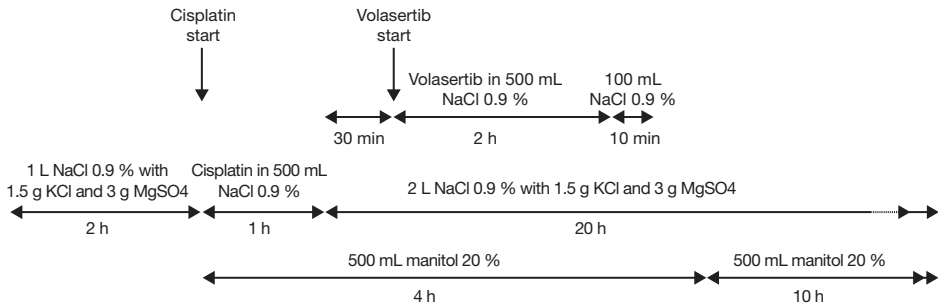**b****Carboplatin arm**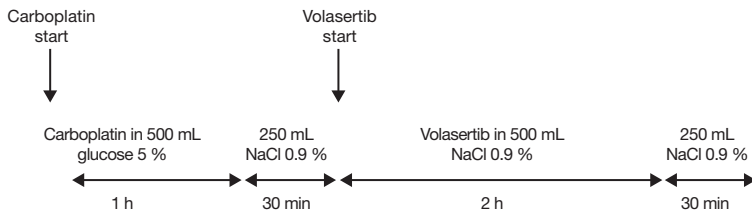

Supplement: MOESM1 [file 8882516]
